# Supplementary material for: In vivo genome and base editing of a human PCSK9 knock-in hypercholesterolemic mouse model
Source: PubMed Central journal article supplement (PMC6334452; doi:10.1186/s12915-018-0624-2), 2019-01-15
Supplement: 12915_2018_624_MOESM2_ESM.pdf [file 12915_2018_624_MOESM2_ESM.pdf]

## Additional file 2: Table S1

Lipoprotein profile of WT and hPCSK9-KI mice.

|                   | 10 weeks  |                | 28 weeks  |                |
|-------------------|-----------|----------------|-----------|----------------|
|                   | WT mice   | hPCSK9-KI mice | WT mice   | hPCSK9-KI mice |
| HDL-C             | 1.23±0.31 | 1.33±0.10      | 1.57±0.35 | 2.12±0.37**    |
| LDL-C             | 0.68±0.05 | 1.53±0.13***   | 2.53±0.71 | 5.95±1.29****  |
| VLDL-C            | 0.05±0.02 | 0.09±0.02*     | 0.10±0.02 | 0.16±0.05**    |
| Total cholesterol | 1.93±0.39 | 2.95±0.21**    | 4.21±1.06 | 8.22±1.54***   |
