# Supplementary material for: In vivo genome and base editing of a human PCSK9 knock-in hypercholesterolemic mouse model
Source: PubMed Central journal article supplement (PMC6334452; doi:10.1186/s12915-018-0624-2), 2019-01-15

# Additional file 3: Fig. S2

**a**

## Exon 1- human *PCSK9*

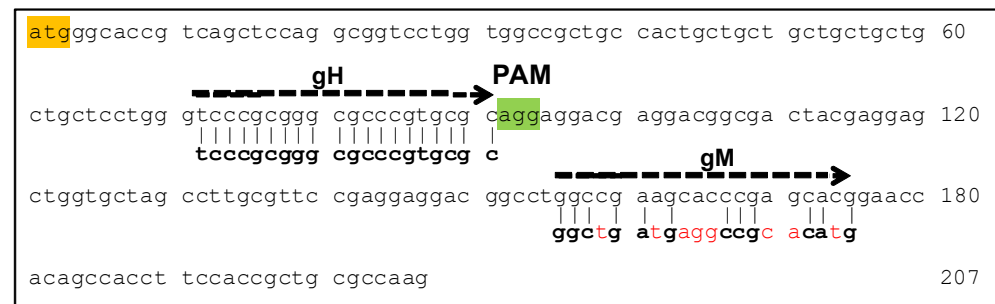

## Exon 1-mouse *Pcsk9*

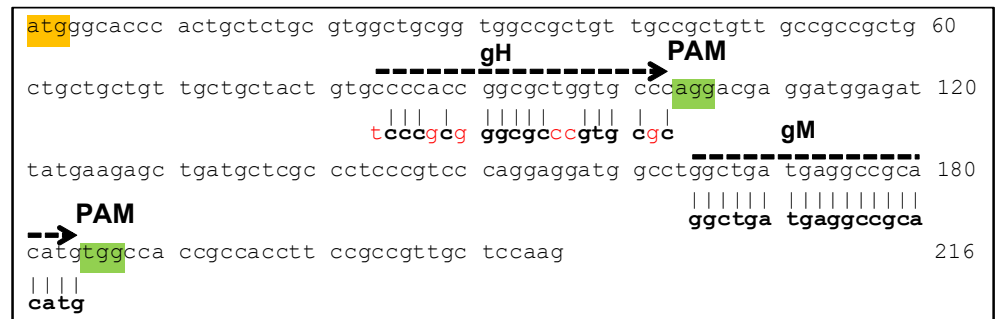

**b**

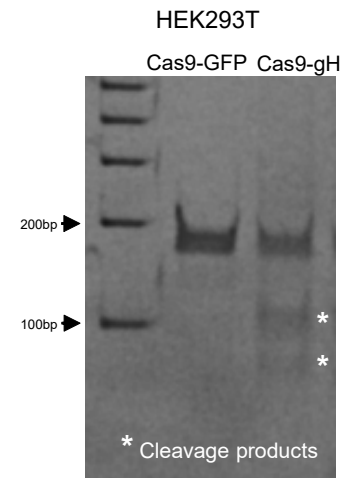

**c**

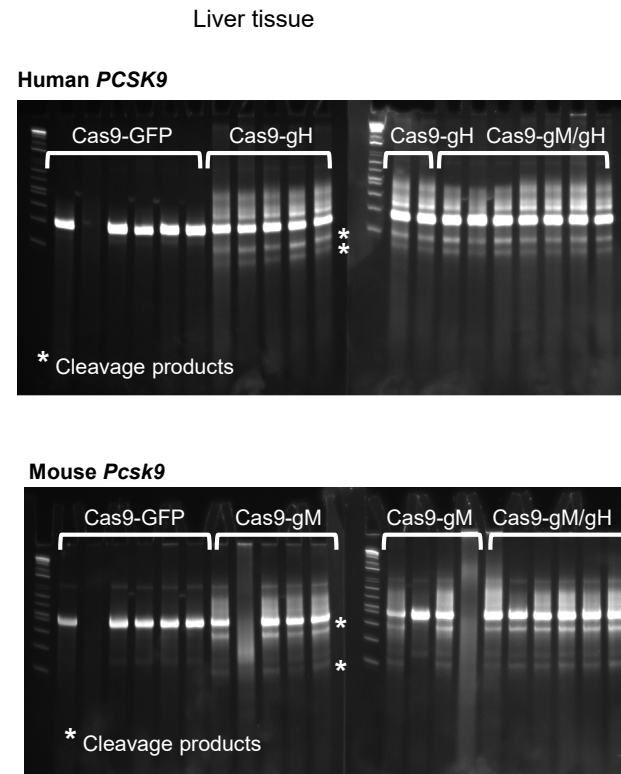

Supplement: 12915_2018_624_MOESM3_ESM.pdf [file 12915_2018_624_MOESM3_ESM.pdf]
