# Supplementary material for: In vivo genome and base editing of a human PCSK9 knock-in hypercholesterolemic mouse model
Source: PubMed Central journal article supplement (PMC6334452; doi:10.1186/s12915-018-0624-2), 2019-01-15
Supplement: 12915_2018_624_MOESM4_ESM.pdf [file 12915_2018_624_MOESM4_ESM.pdf]

## Additional file 4: Table S2

### List of GUIDE-Seq-detected off-targets for gH.

| PCSK9 target site |   |   |   |   |   |   |   |   |   |   |   |   |   |   |   |   |   |   | GUIDE-Seq reads | On and off-target sites |       |                |
|-------------------|---|---|---|---|---|---|---|---|---|---|---|---|---|---|---|---|---|---|-----------------|-------------------------|-------|----------------|
| T                 | C | C | C | G | C | G | G | G | C | G | C | C | C | G | T | G | C | G | C               |                         | PCSK9 |                |
| .                 | . | . | . | . | . | . | . | . | . | . | . | . | . | . | . | . | . | . | .               | .                       | 2265  | PCSK9          |
| C                 | . | . | . | . | . | A | . | . | . | . | . | . | . | . | A | . | . | . | .               | .                       | 624   | Non-coding     |
| G                 | . | . | . | . | . | . | . | . | . | . | . | . | . | . | G | . | . | . | .               | .                       | 229   | TGFB111 intron |
