# Supplementary material for: In vivo genome and base editing of a human PCSK9 knock-in hypercholesterolemic mouse model
Source: PubMed Central journal article supplement (PMC6334452; doi:10.1186/s12915-018-0624-2), 2019-01-15

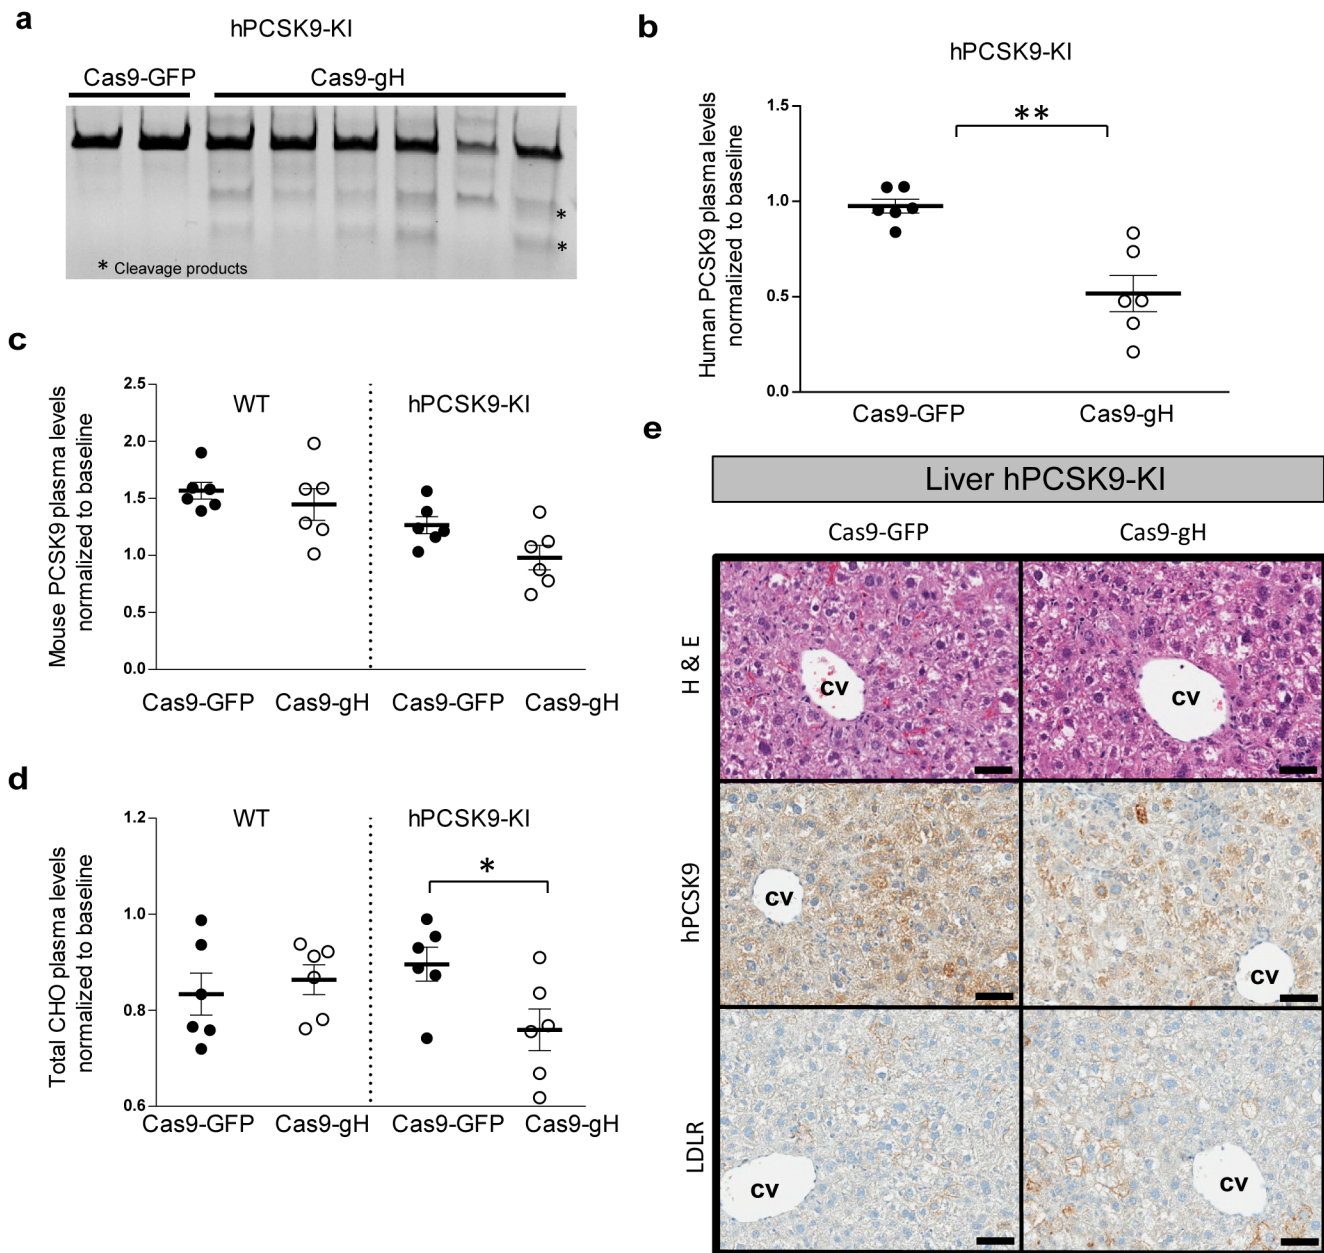

Supplement: 12915_2018_624_MOESM6_ESM.pdf [file 12915_2018_624_MOESM6_ESM.pdf]
