# Supplementary material for: In vivo genome and base editing of a human PCSK9 knock-in hypercholesterolemic mouse model
Source: PubMed Central journal article supplement (PMC6334452; doi:10.1186/s12915-018-0624-2), 2019-01-15

# Additional file 7: Fig. S5

**a**

HEK293T

Targeted base substitutions  
at PCSK9

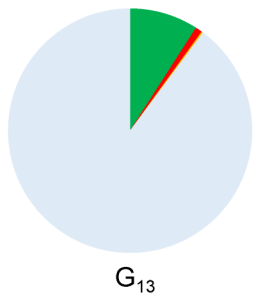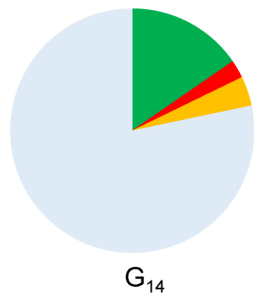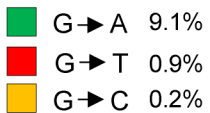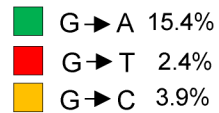

**b**

Liver tissue

Targeted base substitutions  
at PCSK9

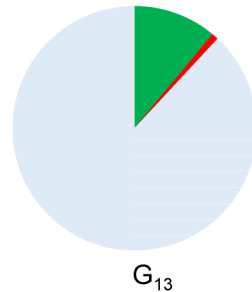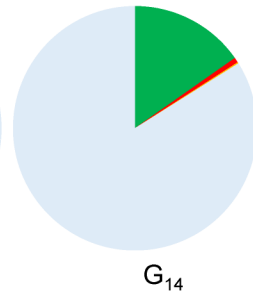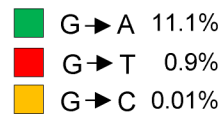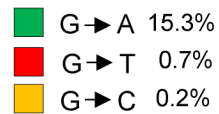

Targeted base substitutions  
at Pcsk9

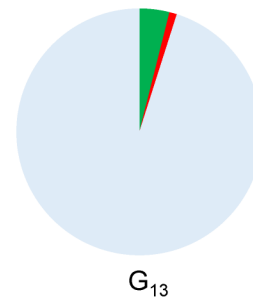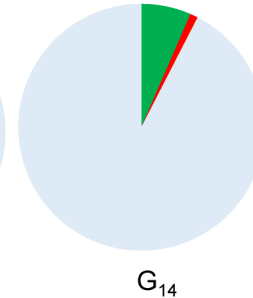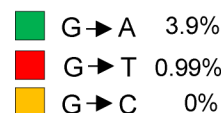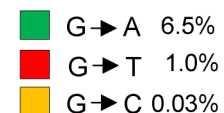

Supplement: 12915_2018_624_MOESM7_ESM.pdf [file 12915_2018_624_MOESM7_ESM.pdf]
