# Supplementary material for: In vivo genome and base editing of a human PCSK9 knock-in hypercholesterolemic mouse model
Source: PubMed Central journal article supplement (PMC6334452; doi:10.1186/s12915-018-0624-2), 2019-01-15
Supplement: 12915_2018_624_MOESM9_ESM.pdf [file 12915_2018_624_MOESM9_ESM.pdf]

## Additional file 9: Table S3

Frequency of null alleles generated by BE3-gMH and Cas9-gMH treatment in hPCSK9-KI mice.

| Treatment | Locus        | Mouse ID       | Editing (absolute %) | Nonsense mutations (absolute %) | In-frame/frameshift mutations (absolute %) | Total null alleles (absolute %) | Total null alleles (relative %) |
|-----------|--------------|----------------|----------------------|---------------------------------|--------------------------------------------|---------------------------------|---------------------------------|
| BE3-gMH   | <i>Pcsk9</i> | #1             | 5,53                 | 2,90                            | 0,24                                       | 3,14                            | 56,78                           |
| BE3-gMH   | <i>Pcsk9</i> | #2             | 6,74                 | 3,94                            | 0,25                                       | 4,19                            | 62,17                           |
| BE3-gMH   | <i>Pcsk9</i> | #3             | 11,60                | 7,66                            | 0,54                                       | 8,20                            | 70,69                           |
| BE3-gMH   | <i>Pcsk9</i> | #4             | 10,30                | 6,37                            | 0,65                                       | 7,02                            | 68,16                           |
| BE3-gMH   | <i>Pcsk9</i> | #5             | 10,30                | 4,60                            | 1,56                                       | 6,16                            | 59,81                           |
| BE3-gMH   | <i>Pcsk9</i> | #6             | 11,10                | 7,38                            | 1,72                                       | 9,10                            | 81,98                           |
| BE3-gMH   | <i>Pcsk9</i> | #7             | 14,40                | 11,35                           | 2,18                                       | 13,53                           | 93,96                           |
| BE3-gMH   | <i>Pcsk9</i> | #8             | 11,90                | 6,12                            | 1,44                                       | 7,56                            | 63,53                           |
|           |              | <b>Average</b> | <b>10,23</b>         | <b>6,29</b>                     | <b>1,07</b>                                | <b>7,36</b>                     | <b>69,63</b>                    |

|         |              |                |              |              |             |              |              |
|---------|--------------|----------------|--------------|--------------|-------------|--------------|--------------|
| BE3-gMH | <i>PCSK9</i> | #1             | 11,11        | 7,38         | 0,86        | 8,24         | 74,17        |
| BE3-gMH | <i>PCSK9</i> | #2             | 14,41        | 9,92         | 1,70        | 11,62        | 80,64        |
| BE3-gMH | <i>PCSK9</i> | #3             | 21,11        | 14,50        | 2,52        | 17,02        | 80,63        |
| BE3-gMH | <i>PCSK9</i> | #4             | 24,08        | 17,66        | 2,20        | 19,86        | 82,48        |
| BE3-gMH | <i>PCSK9</i> | #5             | 25,13        | 10,53        | 1,38        | 11,91        | 47,39        |
| BE3-gMH | <i>PCSK9</i> | #6             | 25,05        | 16,10        | 2,12        | 18,22        | 72,73        |
| BE3-gMH | <i>PCSK9</i> | #7             | 34,93        | 24,52        | 2,80        | 27,32        | 78,21        |
| BE3-gMH | <i>PCSK9</i> | #8             | 28,29        | 17,07        | 2,26        | 19,33        | 68,33        |
|         |              | <b>Average</b> | <b>23,01</b> | <b>14,71</b> | <b>1,98</b> | <b>16,69</b> | <b>73,07</b> |

|          |              |                |              |             |              |              |              |
|----------|--------------|----------------|--------------|-------------|--------------|--------------|--------------|
| Cas9-gMH | <i>Pcsk9</i> | #1             | 29,10        | 0,07        | 19,79        | 19,86        | 68,25        |
| Cas9-gMH | <i>Pcsk9</i> | #2             | 25,43        | 0,06        | 17,86        | 17,92        | 70,47        |
| Cas9-gMH | <i>Pcsk9</i> | #3             | 13,70        | 0,71        | 6,68         | 7,39         | 53,94        |
| Cas9-gMH | <i>Pcsk9</i> | #4             | 16,48        | 0,14        | 10,76        | 10,90        | 66,14        |
| Cas9-gMH | <i>Pcsk9</i> | #5             | 38,16        | 0,28        | 27,09        | 27,37        | 71,72        |
| Cas9-gMH | <i>Pcsk9</i> | #6             | 25,12        | 0,63        | 15,71        | 16,34        | 65,05        |
|          |              | <b>Average</b> | <b>24,43</b> | <b>2,37</b> | <b>14,27</b> | <b>16,64</b> | <b>65,93</b> |

|          |              |                |              |             |              |              |              |
|----------|--------------|----------------|--------------|-------------|--------------|--------------|--------------|
| Cas9-gMH | <i>PCSK9</i> | #1             | 31,08        | 0,07        | 25,59        | 25,66        | 82,56        |
| Cas9-gMH | <i>PCSK9</i> | #2             | 26,05        | 0,07        | 21,47        | 21,54        | 82,69        |
| Cas9-gMH | <i>PCSK9</i> | #3             | 10,23        | 0,33        | 5,35         | 5,68         | 55,52        |
| Cas9-gMH | <i>PCSK9</i> | #4             | 15,42        | 0,53        | 8,93         | 9,46         | 61,35        |
| Cas9-gMH | <i>PCSK9</i> | #5             | 31,45        | 0,35        | 24,17        | 24,52        | 77,97        |
| Cas9-gMH | <i>PCSK9</i> | #6             | 19,33        | 0,22        | 14,40        | 14,62        | 75,63        |
|          |              | <b>Average</b> | <b>22,57</b> | <b>0,56</b> | <b>16,31</b> | <b>16,87</b> | <b>72,62</b> |
