# Supplementary material for: In vivo genome and base editing of a human PCSK9 knock-in hypercholesterolemic mouse model
Source: PubMed Central journal article supplement (PMC6334452; doi:10.1186/s12915-018-0624-2), 2019-01-15
Supplement: 12915_2018_624_MOESM10_ESM.pdf [file 12915_2018_624_MOESM10_ESM.pdf]

## Additional file 10: Table S4

### Most frequent mutant alleles generated by BE3-gMH and Cas9-gMH treatment in hPCK9-KI mice.

| Alleles                                                        | #Reads  | Protein Sequence                                                                       | Type                 | Outcome             | Percentage |
|----------------------------------------------------------------|---------|----------------------------------------------------------------------------------------|----------------------|---------------------|------------|
| ATTGAGGAAGACTCCTTTGTCTTCGCCCAGAGCATCCCATGGAACCTGGAGCGAATTATCC  | 639 466 | Ile Glu Glu Asp Ser Phe Val Phe Ala Gln Ser Ile Pro Trp Asn Leu Glu Arg Ile Ile        | Wild type            | Wild type           | 70,895     |
| ATTGAGGAAGACTCCTTTGTCTTCGCCCAG--GCATCCCATGGAACCTGGAGCGAATTATCC | 30 886  | Ile Glu Glu Asp Ser Phe Val Phe Ala Gln <b>Ala Ser His Gly Thr Trp Ser Glu Leu Ser</b> | Frameshift deletion  | Frameshift Mutation | 3,424      |
| ATTGAGGAAGACTCCTTTGTCTTCGCCCAG--CATCCCATGGAACCTGGAGCGAATTATCC  | 28 789  | Ile Glu Glu Asp Ser Phe Val Phe Ala Gln <b>Thr Ser His Gly Thr Trp Ser Glu Leu Ser</b> | Frameshift deletion  | Frameshift Mutation | 3,192      |
| ATTGAGGAAGACTCCTTTGTCTTCGCCCAGAGCATCCCATGGAACCTGGAGCGAATTATCC  | 18 394  | Ile Glu Glu Asp Ser Phe Val Phe Ala Gln <b>Lys His Pro Met Glu Pro Gly Ala Asn Tyr</b> | Frameshift insertion | Frameshift Mutation | 2,039      |
| ATTGAGGAAGACTCCTTTGTCTTCGCCCAGAGGCATCCCATGGAACCTGGAGCGAATTATCC | 13 238  | Ile Glu Glu Asp Ser Phe Val Phe Ala Gln <b>Arg His Pro Met Glu Pro Gly Ala Asn Tyr</b> | Frameshift insertion | Frameshift Mutation | 1,468      |
| ATTGAGGAAGACTCCTTTGTCTTCGCCCAGATGCATCCCATGGAACCTGGAGCGAATTATCC | 9 361   | Ile Glu Glu Asp Ser Phe Val Phe Ala Gln <b>Met His Pro Met Glu Pro Gly Ala Asn Tyr</b> | Frameshift insertion | Frameshift Mutation | 1,038      |
| ATTGAGGAAGACTCCTTTGTCTTCGCCC--AGCATCCCATGGAACCTGGAGCGAATTATCC  | 9 260   | Ile Glu Glu Asp Ser Phe Val Phe Ala Gln <b>His Pro Met Glu Pro Gly Ala Asn Tyr</b>     | Frameshift deletion  | Frameshift Mutation | 1,027      |
| ATTGAGGAAGACTCCTTTGTCTTCGCCCA-----GAACCTGGAGCGAATTATCC         | 4 404   | Ile Glu Glu Asp Ser Phe Val Phe Ala Gln Asn Leu Glu Arg Ile Ile                        | Inframe deletion     | Inframe Mutation    | 0,488      |

#### Cas9-gMH (#2\_mPcsk9)

| Alleles                                                        | #Reads  | Protein Sequence                                                                       | Type                 | Outcome             | Percentage |
|----------------------------------------------------------------|---------|----------------------------------------------------------------------------------------|----------------------|---------------------|------------|
| ATTGAGGAAGACTCCTTTGTCTTCGCCCAGAGCATCCCATGGAACCTGGAGCGAATTATCC  | 405 587 | Ile Glu Glu Asp Ser Phe Val Phe Ala Gln Ser Ile Pro Trp Asn Leu Glu Arg Ile Ile        | Wild type            | Wild type           | 74,565     |
| ATTGAGGAAGACTCCTTTGTCTTCGCCCAG--GCATCCCATGGAACCTGGAGCGAATTATCC | 16 414  | Ile Glu Glu Asp Ser Phe Val Phe Ala Gln <b>Thr Ser His Gly Thr Trp Ser Glu Leu Ser</b> | Frameshift deletion  | Frameshift Mutation | 3,018      |
| ATTGAGGAAGACTCCTTTGTCTTCGCCCAG--CATCCCATGGAACCTGGAGCGAATTATCC  | 14 968  | Ile Glu Glu Asp Ser Phe Val Phe Ala Gln <b>Ala Ser His Gly Thr Trp Ser Glu Leu Ser</b> | Frameshift deletion  | Frameshift Mutation | 2,752      |
| ATTGAGGAAGACTCCTTTGTCTTCGCCCAGAGCATCCCATGGAACCTGGAGCGAATTATCC  | 7 914   | Ile Glu Glu Asp Ser Phe Val Phe Ala Gln <b>Lys His Pro Met Glu Pro Gly Ala Asn Tyr</b> | Frameshift insertion | Frameshift Mutation | 1,455      |
| ATTGAGGAAGACTCCTTTGTCTTCGCCCAGAGGCATCCCATGGAACCTGGAGCGAATTATCC | 7 115   | Ile Glu Glu Asp Ser Phe Val Phe Ala Gln <b>Arg His Pro Met Glu Pro Gly Ala Asn Tyr</b> | Frameshift insertion | Frameshift Mutation | 1,308      |
| ATTGAGGAAGACTCCTTTGTCTTCGCCC--AGCATCCCATGGAACCTGGAGCGAATTATCC  | 7 088   | Ile Glu Glu Asp Ser Phe Val Phe Ala Gln <b>His Pro Met Glu Pro Gly Ala Asn Tyr</b>     | Frameshift deletion  | Frameshift Mutation | 1,303      |
| ATTGAGGAAGACTCCTTTGTCTTCGCCCAGATGCATCCCATGGAACCTGGAGCGAATTATCC | 4 151   | Ile Glu Glu Asp Ser Phe Val Phe Ala Gln <b>Met His Pro Met Glu Pro Gly Ala Asn Tyr</b> | Frameshift insertion | Frameshift Mutation | 0,763      |
| ATTGAGGAAGACTCCTTTGTCTTCGCCCAG--ATCCCATGGAACCTGGAGCGAATTATCC   | 2 263   | Ile Glu Glu Asp Ser Phe Val Phe Ala Gln Ile Pro Trp Asn Leu Glu Arg Ile Ile            | Inframe deletion     | Inframe Mutation    | 0,416      |

#### Cas9-gMH (#3\_mPcsk9)

| Alleles                                                     | #Reads  | Protein Sequence                                                                   | Type                  | Outcome                     | Percentage |
|-------------------------------------------------------------|---------|------------------------------------------------------------------------------------|-----------------------|-----------------------------|------------|
| GAGGAAGACTCCTTTGTCTTCGCCCAGAGCATCCCATGGAACCTGGAGCGAATTATCC  | 241 998 | Glu Glu Asp Ser Phe Val Phe Ala Gln Ser Ile Pro Trp Asn Leu Glu Arg Ile Ile        | Wild type             | Wild type                   | 86,277     |
| GAGGAAGACTCCTTTGTCTTCGCCCAG--GCATCCCATGGAACCTGGAGCGAATTATCC | 2 771   | Glu Glu Asp Ser Phe Val Phe Ala Gln <b>Thr Ser His Gly Thr Trp Ser Glu Leu Ser</b> | Frameshift deletion   | Frameshift Mutation         | 0,988      |
| GAGGAAGACTCCTTTGTCTTCGCCCAG--GCATCCCATGGAACCTGGAGCGAATTATCC | 2 533   | Glu Glu Asp Ser Phe Val Phe Ala Gln <b>Ala Ser His Gly Thr Trp Ser Glu Leu Ser</b> | Frameshift deletion   | Frameshift Mutation         | 0,903      |
| GAGGAAGACTCCTTTGTCTTCGCCCAGAGCATCCCATGGAACCTGGAGCGAATTATCC  | 1 658   | Glu Glu Asp Ser Phe Val Phe Ala Gln <b>Lys His Pro Met Glu Pro Gly Ala Asn Tyr</b> | Frameshift insertion  | Frameshift Mutation         | 0,591      |
| GAGGAAGACTCCTTTGTCTTCGCCC--AGCATCCCATGGAACCTGGAGCGAATTATCC  | 1 199   | Glu Glu Asp Ser Phe Val Phe Ala Gln <b>His Pro Met Glu Pro Gly Ala Asn Tyr</b>     | Frameshift deletion   | Frameshift Mutation         | 0,427      |
| GAGGAAGACTCCTTTGTCTTCGCCCAGAGCATCCCATGGAACCTGGAGCGAATTATCC  | 1 092   | Glu Glu Asp Ser Phe Val Phe Ala Gln Ser Ile <b>Gln</b> Trp Asn Leu Glu Arg Ile Ile | Substitution, Pro>Gln | Missense Mutation           | 0,389      |
| GAGGAAGACTCCTTTGTCTTCGCCCAGAGCATCCCATGGAACCTGGAGCGAATTATCC  | 1 075   | Glu Glu Asp Ser Phe Val Phe Ala <b>Lys</b> Ser Ile Pro Trp Asn Leu Glu Arg Ile Ile | Substitution, Gln>Lys | Missense Mutation           | 0,383      |
| GAGGAAGACTCCTTTGTCTTCGCCCAGAGGCATCCCATGGAACCTGGAGCGAATTATCC | 1 071   | Glu Glu Asp Ser Phe Val Phe Ala Gln <b>Arg His Pro Met Glu Pro Gly Ala Asn Tyr</b> | Frameshift insertion  | Frameshift Mutation         | 0,382      |
| GAGGAAGACTCCTTTGTCTTCGCCCAGAGCATCCCATGGAACCTGGAGCGAATTATCC  | 874     | Glu Glu Asp Ser Phe Val Phe Ala Gln Ser Ile Pro Trp Asn Leu <b>Stp</b>             | Substitution, Glu>Stp | Nonsense Mutation, Knockout | 0,312      |

#### Cas9-gMH (#4\_mPcsk9)

| Alleles                                                     | #Reads  | Protein Sequence                                                                   | Type                 | Outcome             | Percentage |
|-------------------------------------------------------------|---------|------------------------------------------------------------------------------------|----------------------|---------------------|------------|
| GAGGAAGACTCCTTTGTCTTCGCCCAGAGCATCCCATGGAACCTGGAGCGAATTATCC  | 352 427 | Glu Glu Asp Ser Phe Val Phe Ala Gln Ser Ile Pro Trp Asn Leu Glu Arg Ile Ile        | Wild type            | Wild type           | 83,519     |
| GAGGAAGACTCCTTTGTCTTCGCCCAG--GCATCCCATGGAACCTGGAGCGAATTATCC | 8 972   | Glu Glu Asp Ser Phe Val Phe Ala Gln <b>Thr Ser His Gly Thr Trp Ser Glu Leu Ser</b> | Frameshift deletion  | Frameshift Mutation | 2,126      |
| GAGGAAGACTCCTTTGTCTTCGCCCAG--GCATCCCATGGAACCTGGAGCGAATTATCC | 7 546   | Glu Glu Asp Ser Phe Val Phe Ala Gln <b>Ala Ser His Gly Thr Trp Ser Glu Leu Ser</b> | Frameshift deletion  | Frameshift Mutation | 1,788      |
| GAGGAAGACTCCTTTGTCTTCGCCCAGAGCATCCCATGGAACCTGGAGCGAATTATCC  | 4 135   | Glu Glu Asp Ser Phe Val Phe Ala Gln <b>Lys His Pro Met Glu Pro Gly Ala Asn Tyr</b> | Frameshift insertion | Frameshift Mutation | 0,980      |
| GAGGAAGACTCCTTTGTCTTCGCCC--AGCATCCCATGGAACCTGGAGCGAATTATCC  | 2 889   | Glu Glu Asp Ser Phe Val Phe Ala Gln <b>His Pro Met Glu Pro Gly Ala Asn Tyr</b>     | Frameshift deletion  | Frameshift Mutation | 0,685      |
| GAGGAAGACTCCTTTGTCTTCGCCCAGAGGCATCCCATGGAACCTGGAGCGAATTATCC | 2 056   | Glu Glu Asp Ser Phe Val Phe Ala Gln <b>Arg His Pro Met Glu Pro Gly Ala Asn Tyr</b> | Frameshift insertion | Frameshift Mutation | 0,487      |
| GAGGAAGACTCCTTTGTCTTCGCCCAGATGCATCCCATGGAACCTGGAGCGAATTATCC | 1 510   | Glu Glu Asp Ser Phe Val Phe Ala Gln <b>Met His Pro Met Glu Pro Gly Ala Asn Tyr</b> | Frameshift insertion | Frameshift Mutation | 0,358      |
| GAGGAAGACTCCTTTGTCTTCGCCCAG--ATCCCATGGAACCTGGAGCGAATTATCC   | 979     | Glu Glu Asp Ser Phe Val Phe Ala Gln Ile Pro Trp Asn Leu Glu Arg Ile Ile            | Inframe deletion     | Inframe Mutation    | 0,232      |
| GAGGAAGACTCCTTTGTCTTCGCC-----CCCATGGAACCTGGAGCGAATTATCC     | 796     | Glu Glu Asp Ser Phe Val Phe Ala <b>His Gly Thr Trp Ser Glu Leu Ser</b>             | Frameshift deletion  | Frameshift Mutation | 0,189      |
| GAGGAAGACTCCTTTGTCTTCGCCCAG--ATCCCATGGAACCTGGAGCGAATTATCC   | 642     | Glu Glu Asp Ser Phe Val Phe Ala Gln <b>Asn Pro Met Glu Pro Gly Ala Asn Tyr</b>     | Frameshift deletion  | Frameshift Mutation | 0,152      |

Cas9-gMH (#5\_mPcsk9)

| Alleles                                                   | #Reads  | Protein Sequence                                                            | Type                 | Outcome             | Percentage |
|-----------------------------------------------------------|---------|-----------------------------------------------------------------------------|----------------------|---------------------|------------|
| GAGGAAGACTCCTTTGTCCTCGCCAGAGCATCCCATGGAACCTGGAGCGAATTATCC | 141 381 | Glu Glu Asp Ser Phe Val Phe Ala Gln Ser Ile Pro Trp Asn Leu Glu Arg Ile Ile | Wild type            | Wild type           | 61,838     |
| GAGGAAGACTCCTTTGTCCTCGCCAGAGCATCCCATGGAACCTGGAGCGAATTATCC | 13 811  | Glu Glu Asp Ser Phe Val Phe Ala Gln Thr Ser His Gly Thr Trp Ser Glu Leu Ser | Frameshift deletion  | Frameshift Mutation | 6,041      |
| GAGGAAGACTCCTTTGTCCTCGCCAGAGCATCCCATGGAACCTGGAGCGAATTATCC | 10 038  | Glu Glu Asp Ser Phe Val Phe Ala Gln Ala Ser His Gly Thr Trp Ser Glu Leu Ser | Frameshift deletion  | Frameshift Mutation | 4,390      |
| GAGGAAGACTCCTTTGTCCTCGCCAGAGCATCCCATGGAACCTGGAGCGAATTATCC | 5 480   | Glu Glu Asp Ser Phe Val Phe Ala Gln Lys His Pro Met Glu Pro Gly Ala Asn Tyr | Frameshift insertion | Frameshift Mutation | 2,397      |
| GAGGAAGACTCCTTTGTCCTCGCCAGAGCATCCCATGGAACCTGGAGCGAATTATCC | 4 496   | Glu Glu Asp Ser Phe Val Phe Ala Gln His Pro Met Glu Pro Gly Ala Asn Tyr     | Frameshift deletion  | Frameshift Mutation | 1,966      |
| GAGGAAGACTCCTTTGTCCTCGCCAGAGCATCCCATGGAACCTGGAGCGAATTATCC | 3 242   | Glu Glu Asp Ser Phe Val Phe Ala Gln Arg His Pro Met Glu Pro Gly Ala Asn Tyr | Frameshift insertion | Frameshift Mutation | 1,418      |
| GAGGAAGACTCCTTTGTCCTCGCCAGAGCATCCCATGGAACCTGGAGCGAATTATCC | 2 346   | Glu Glu Asp Ser Phe Val Phe Ala Gln Met His Pro Met Glu Pro Gly Ala Asn Tyr | Frameshift insertion | Frameshift Mutation | 1,026      |
| GAGGAAGACTCCTTTGTCCTCGCCAGAGCATCCCATGGAACCTGGAGCGAATTATCC | 1 231   | Glu Glu Asp Ser Phe Val Phe Ala Gln Ile Pro Trp Asn Leu Glu Arg Ile Ile     | Inframe deletion     | Inframe Mutation    | 0,538      |
| GAGGAAGACTCCTTTGTCCTCGCCAGAGCATCCCATGGAACCTGGAGCGAATTATCC | 1 042   | Glu Glu Asp Ser Phe Val Phe Ala His Gly Thr Trp Ser Glu Leu Ser             | Frameshift deletion  | Frameshift Mutation | 0,456      |
| GAGGAAGACTCCTTTGTCCTCGCCAGAGCATCCCATGGAACCTGGAGCGAATTATCC | 906     | Glu Glu Asp Ser Phe Val Phe Ala Gln Asn Pro Met Glu Pro Gly Ala Asn Tyr     | Frameshift deletion  | Frameshift Mutation | 0,396      |

Cas9-gMH (#6\_mPcsk9)

| Alleles                                                   | #Reads  | Protein Sequence                                                            | Type                  | Outcome             | Percentage |
|-----------------------------------------------------------|---------|-----------------------------------------------------------------------------|-----------------------|---------------------|------------|
| GAGGAAGACTCCTTTGTCCTCGCCAGAGCATCCCATGGAACCTGGAGCGAATTATCC | 158 653 | Glu Glu Asp Ser Phe Val Phe Ala Gln Ser Ile Pro Trp Asn Leu Glu Arg Ile Ile | Wild type             | Wild type           | 74,878     |
| GAGGAAGACTCCTTTGTCCTCGCCAGAGCATCCCATGGAACCTGGAGCGAATTATCC | 6 436   | Glu Glu Asp Ser Phe Val Phe Ala Gln Thr Ser His Gly Thr Trp Ser Glu Leu Ser | Frameshift deletion   | Frameshift Mutation | 3,038      |
| GAGGAAGACTCCTTTGTCCTCGCCAGAGCATCCCATGGAACCTGGAGCGAATTATCC | 6 042   | Glu Glu Asp Ser Phe Val Phe Ala Gln Ala Ser His Gly Thr Trp Ser Glu Leu Ser | Frameshift deletion   | Frameshift Mutation | 2,852      |
| GAGGAAGACTCCTTTGTCCTCGCCAGAGCATCCCATGGAACCTGGAGCGAATTATCC | 2 594   | Glu Glu Asp Ser Phe Val Phe Ala Gln Lys His Pro Met Glu Pro Gly Ala Asn Tyr | Frameshift insertion  | Frameshift Mutation | 1,224      |
| GAGGAAGACTCCTTTGTCCTCGCCAGAGCATCCCATGGAACCTGGAGCGAATTATCC | 2 290   | Glu Glu Asp Ser Phe Val Phe Ala Gln His Pro Met Glu Pro Gly Ala Asn Tyr     | Frameshift deletion   | Frameshift Mutation | 1,081      |
| GAGGAAGACTCCTTTGTCCTCGCCAGAGCATCCCATGGAACCTGGAGCGAATTATCC | 1 703   | Glu Glu Asp Ser Phe Val Phe Ala Gln Arg His Pro Met Glu Pro Gly Ala Asn Tyr | Frameshift insertion  | Frameshift Mutation | 0,804      |
| GAGGAAGACTCCTTTGTCCTCGCCAGAGCATCCCATGGAACCTGGAGCGAATTATCC | 851     | Glu Glu Asp Ser Phe Val Phe Ala Gln Met His Pro Met Glu Pro Gly Ala Asn Tyr | Frameshift insertion  | Frameshift Mutation | 0,402      |
| GAGGAAGACTCCTTTGTCCTCGCCAGAGCATCCCATGGAACCTGGAGCGAATTATCC | 801     | Glu Glu Asp Ser Phe Val Phe Ala Gln Ser Ile Gln Trp Asn Leu Glu Arg Ile Ile | Substitution, Pro>Gln | Missense Mutation   | 0,378      |
| GAGGAAGACTCCTTTGTCCTCGCCAGAGCATCCCATGGAACCTGGAGCGAATTATCC | 693     | Glu Glu Asp Ser Phe Val Phe Ala Lys Ser Ile Pro Trp Asn Leu Glu Arg Ile Ile | Substitution, Gln>Lys | Missense Mutation   | 0,327      |
| GAGGAAGACTCCTTTGTCCTCGCCAGAGCATCCCATGGAACCTGGAGCGAATTATCC | 683     | Glu Glu Asp Ser Phe Val Phe Ala Gln Asn Pro Met Glu Pro Gly Ala Asn Tyr     | Frameshift deletion   | Frameshift Mutation | 0,322      |

Cas9-gMH (#1\_ hPCKSK9)

| Alleles                                                             | #Reads  | Protein Sequence                                                                        | Type                 | Outcome             | Percentage |
|---------------------------------------------------------------------|---------|-----------------------------------------------------------------------------------------|----------------------|---------------------|------------|
| TACATCGAGGAGGACTCCTCTGTCTTTGGCCAGAGCATCCCGTGGAACTGGAGCGGATTACCCCTC  | 154 977 | Tyr Ile Glu Glu Asp Ser Ser Val Phe Ala Gln Ser Ile Pro Trp Asn Leu Glu Arg Ile Thr Pro | Wild type            | Wild type           | 68,920     |
| TACATCGAGGAGGACTCCTCTGTCTTTGGCCAG--GCATCCCGTGGAACTGGAGCGGATTACCCCTC | 15 725  | Tyr Ile Glu Glu Asp Ser Ser Val Phe Ala Gln Ala Ser Arg Gly Thr Trp Ser Gly Leu Pro Leu | Frameshift deletion  | Frameshift Mutation | 6,993      |
| TACATCGAGGAGGACTCCTCTGTCTTTGGCCAG--CATCCCGTGGAACTGGAGCGGATTACCCCTC  | 10 529  | Tyr Ile Glu Glu Asp Ser Ser Val Phe Ala Gln Thr Ser Arg Gly Thr Trp Ser Gly Leu Pro Leu | Frameshift deletion  | Frameshift Mutation | 4,682      |
| TACATCGAGGAGGACTCCTCTGTCTTTGGCC--AGCATCCCGTGGAACTGGAGCGGATTACCCCTC  | 5 519   | Tyr Ile Glu Glu Asp Ser Ser Val Phe Ala Gln His Pro Val Glu Pro Gly Ala Asp Tyr Pro     | Frameshift deletion  | Frameshift Mutation | 2,454      |
| TACATCGAGGAGGACTCCTCTGTCTTTGGCCAGAAGCATCCCGTGGAACTGGAGCGGATTACCCCTC | 5 062   | Tyr Ile Glu Glu Asp Ser Ser Val Phe Ala Gln Lys His Pro Val Glu Pro Gly Ala Asp Tyr Pro | Frameshift insertion | Frameshift Mutation | 2,251      |
| TACATCGAGGAGGACTCCTCTGTCTTTGGCCAGAGCATCCCGTGGAACTGGAGCGGATTACCCCTC  | 2 467   | Tyr Ile Glu Glu Asp Ser Ser Val Phe Ala Gln Arg His Pro Val Glu Pro Gly Ala Asp Tyr Pro | Frameshift insertion | Frameshift Mutation | 1,097      |
| TACATCGAGGAGGACTCCTCTGTCTTTGGCCAGATGCATCCCGTGGAACTGGAGCGGATTACCCCTC | 1812    | Tyr Ile Glu Glu Asp Ser Ser Val Phe Ala Gln Met His Pro Val Glu Pro Gly Ala Asp Tyr Pro | Frameshift insertion | Frameshift Mutation | 8,086      |
| TACATCGAGGAGGACTCCTCTGTCTTTGGCCAG--ATCCCGTGGAACTGGAGCGGATTACCCCTC   | 1 038   | Tyr Ile Glu Glu Asp Ser Ser Val Phe Ala Gln Asn Pro Val Glu Pro Gly Ala Asp Tyr Pro     | Frameshift deletion  | Frameshift Mutation | 0,462      |
| TACATCGAGGAGGACTCCTCTGTCTTT-----GCATCCCGTGGAACTGGAGCGGATTACCCCTC    | 981     | Tyr Ile Glu Glu Asp Ser Ser Val Phe Ala Ser Arg Gly Thr Trp Ser Gly Leu Pro Leu         | Frameshift deletion  | Frameshift Mutation | 0,436      |
| TACATCGAGGAGGACTCCTCTGTCTTT-----GCATCCCGTGGAACTGGAGCGGATTACCCCTC    | 885     | Tyr Ile Glu Glu Asp Ser Ser Val Leu His Pro Val Glu Pro Gly Ala Asp Tyr Pro             | Frameshift deletion  | Frameshift Mutation | 0,394      |

Cas9-gMH (#2\_ hPCKSK9)

| Alleles                                                             | #Reads  | Protein Sequence                                                                        | Type                 | Outcome             | Percentage |
|---------------------------------------------------------------------|---------|-----------------------------------------------------------------------------------------|----------------------|---------------------|------------|
| TACATCGAGGAGGACTCCTCTGTCTTTGGCCAGAGCATCCCGTGGAACTGGAGCGGATTACCCCTC  | 275 055 | Tyr Ile Glu Glu Asp Ser Ser Val Phe Ala Gln Ser Ile Pro Trp Asn Leu Glu Arg Ile Thr Pro | Wild type            | Wild type           | 73,946     |
| TACATCGAGGAGGACTCCTCTGTCTTTGGCCAG--GCATCCCGTGGAACTGGAGCGGATTACCCCTC | 21 750  | Tyr Ile Glu Glu Asp Ser Ser Val Phe Ala Gln Ala Ser Arg Gly Thr Trp Ser Gly Leu Pro Leu | Frameshift deletion  | Frameshift Mutation | 5,847      |
| TACATCGAGGAGGACTCCTCTGTCTTTGGCCAG--CATCCCGTGGAACTGGAGCGGATTACCCCTC  | 17 804  | Tyr Ile Glu Glu Asp Ser Ser Val Phe Ala Gln Thr Ser Arg Gly Thr Trp Ser Gly Leu Pro Leu | Frameshift deletion  | Frameshift Mutation | 4,786      |
| TACATCGAGGAGGACTCCTCTGTCTTTGGCCAGAGCATCCCGTGGAACTGGAGCGGATTACCCCTC  | 8 315   | Tyr Ile Glu Glu Asp Ser Ser Val Phe Ala Gln Lys His Pro Val Glu Pro Gly Ala Asp Tyr Pro | Frameshift insertion | Frameshift Mutation | 2,235      |
| TACATCGAGGAGGACTCCTCTGTCTTTGGCC--AGCATCCCGTGGAACTGGAGCGGATTACCCCTC  | 5 972   | Tyr Ile Glu Glu Asp Ser Ser Val Phe Ala Gln His Pro Val Glu Pro Gly Ala Asp Tyr Pro     | Frameshift deletion  | Frameshift Mutation | 1,606      |
| TACATCGAGGAGGACTCCTCTGTCTTTGGCCAGATGCATCCCGTGGAACTGGAGCGGATTACCCCTC | 2 587   | Tyr Ile Glu Glu Asp Ser Ser Val Phe Ala Gln Met His Pro Val Glu Pro Gly Ala Asp Tyr Pro | Frameshift insertion | Frameshift Mutation | 0,695      |
| TACATCGAGGAGGACTCCTCTGTCTTTGGCCAGAGCATCCCGTGGAACTGGAGCGGATTACCCCTC  | 2 241   | Tyr Ile Glu Glu Asp Ser Ser Val Phe Ala Gln Arg His Pro Val Glu Pro Gly Ala Asp Tyr Pro | Frameshift insertion | Frameshift Mutation | 0,602      |
| -----GCATCCCGTGGAACTGGAGCGGATTACCCCTC                               | 1 806   | Ala Ser Arg Gly Thr Trp Ser Gly Leu Pro Leu                                             | Frameshift deletion  | Frameshift Mutation | 0,486      |
| TACATCGAGGAGGACTCCTCTGTCTTTGGCCAG--ATCCCGTGGAACTGGAGCGGATTACCCCTC   | 1 587   | Tyr Ile Glu Glu Asp Ser Ser Val Phe Ala Gln Ile Pro Trp Asn Leu Glu Arg Ile Thr Pro     | Inframe deletion     | Inframe Mutation    | 0,427      |
| TACATCGAGGAGGACTCCTCTGT-----GCATCCCGTGGAACTGGAGCGGATTACCCCTC        | 1 344   | Tyr Ile Glu Glu Asp Ser Ser Val His Pro Val Glu Pro Gly Ala Asp Tyr Pro                 | Frameshift deletion  | Frameshift Mutation | 0,361      |

Cas9-gMH (#3\_ hPCKSK9)

| Alleles                                                             | #Reads  | Protein Sequence                                                                        | Type                  | Outcome             | Percentage |
|---------------------------------------------------------------------|---------|-----------------------------------------------------------------------------------------|-----------------------|---------------------|------------|
| TACATCGAGGAGGACTCCTCTGTCTTTGGCCAGAGCATCCCGTGGAACTGGAGCGGATTACCCCTC  | 263 766 | Tyr Ile Glu Glu Asp Ser Ser Val Phe Ala Gln Ser Ile Pro Trp Asn Leu Glu Arg Ile Thr Pro | Wild type             | Wild type           | 89,767     |
| TACATCGAGGAGGACTCCTCTGTCTTTGGCCAG--GCATCCCGTGGAACTGGAGCGGATTACCCCTC | 4 852   | Tyr Ile Glu Glu Asp Ser Ser Val Phe Ala Gln Ala Ser Arg Gly Thr Trp Ser Gly Leu Pro Leu | Frameshift deletion   | Frameshift Mutation | 1,651      |
| TACATCGAGGAGGACTCCTCTGTCTTTGGCCAG--CATCCCGTGGAACTGGAGCGGATTACCCCTC  | 3 136   | Tyr Ile Glu Glu Asp Ser Ser Val Phe Ala Gln Thr Ser Arg Gly Thr Trp Ser Gly Leu Pro Leu | Frameshift deletion   | Frameshift Mutation | 1,067      |
| TACATCGAGGAGGACTCCTCTGTCTTTGGCC--AGCATCCCGTGGAACTGGAGCGGATTACCCCTC  | 1 643   | Tyr Ile Glu Glu Asp Ser Ser Val Phe Ala Gln His Pro Val Glu Pro Gly Ala Asp Tyr Pro     | Frameshift deletion   | Frameshift Mutation | 0,559      |
| TACATCGAGGAGGACTCCTCTGTCTTTGGCCAGAGCATCCCGTGGAACTGGAGCGGATTACCCCTC  | 1 418   | Tyr Ile Glu Glu Asp Ser Ser Val Phe Ala Gln Lys His Pro Val Glu Pro Gly Ala Asp Tyr Pro | Frameshift insertion  | Frameshift Mutation | 0,483      |
| TACATCGAGGAGGACTCCTCTGTCTTTGGCCAGAGCATCCCGTGGAACTGGAGCGGATTACCCCTC  | 672     | Tyr Ile Glu Glu Asp Ser Ser Val Phe Ala Gln Ser Ile Pro Trp Asn Leu Glu Arg Ile Thr Thr | Substitution, Pro>Thr | Missense Mutation   | 0,229      |
| TACATCGAGGAGGACTCCTCTGTCTTTGGCCAGAGCATCCCGTGGAACTGGAGCGGATTACCCCTC  | 651     | Tyr Ile Glu Glu Asp Ser Ser Val Phe Ala Gln Ser Ile Gln Trp Asn Leu Glu Arg Ile Thr Pro | Substitution, Pro>Gln | Missense Mutation   | 0,222      |
| TACATCGAGGAGGACTCCTCTGTCTTTGGCCAGAGCATCCCGTGGAACTGGAGCGGATTACCCCTC  | 598     | Tyr Ile Glu Glu Asp Ser Ser Val Phe Ala Gln Ser Ile Pro Trp Asn Leu Glu Arg Ile Thr His | Substitution, Pro>His | Missense Mutation   | 0,204      |
| TACATCGAGGAGGACTCCTCTGTCTTTGGCCAGAGCATCCCGTGGAACTGGAGCGGATTACCCCTC  | 494     | Tyr Ile Glu Glu Asp Ser Ser Val Phe Ala Lys Ser Ile Pro Trp Asn Leu Glu Arg Ile Thr Pro | Substitution, Gln>Lys | Missense Mutation   | 0,168      |
| TACATCGAGGAGGACTCCTCTGTCTTTGGCCAGAGCATCCCGTGGAACTGGAGCGGATTACCCCTC  | 486     | Tyr Ile Glu Glu Asp Ser Ser Val Phe Ala Gln Arg His Pro Val Glu Pro Gly Ala Asp Tyr Pro | Frameshift insertion  | Frameshift Mutation | 0,165      |

Cas9-gMH (#4\_ hPCKSK9)

| Alleles                                                             | #Reads  | Protein Sequence                                                                        | Type                  | Outcome             | Percentage |
|---------------------------------------------------------------------|---------|-----------------------------------------------------------------------------------------|-----------------------|---------------------|------------|
| TACATCGAGGAGGACTCCTCTGTCTTTGGCCAGAGCATCCCGTGGAACTGGAGCGGATTACCCCTC  | 288 062 | Tyr Ile Glu Glu Asp Ser Ser Val Phe Ala Gln Ser Ile Pro Trp Asn Leu Glu Arg Ile Thr Pro | Wild type             | Wild type           | 84,576     |
| TACATCGAGGAGGACTCCTCTGTCTTTGGCCAG--GCATCCCGTGGAACTGGAGCGGATTACCCCTC | 9 185   | Tyr Ile Glu Glu Asp Ser Ser Val Phe Ala Gln Ala Ser Arg Gly Thr Trp Ser Gly Leu Pro Leu | Frameshift deletion   | Frameshift Mutation | 2,697      |
| TACATCGAGGAGGACTCCTCTGTCTTTGGCCAG--CATCCCGTGGAACTGGAGCGGATTACCCCTC  | 6 894   | Tyr Ile Glu Glu Asp Ser Ser Val Phe Ala Gln Thr Ser Arg Gly Thr Trp Ser Gly Leu Pro Leu | Frameshift deletion   | Frameshift Mutation | 2,024      |
| TACATCGAGGAGGACTCCTCTGTCTTTGGCCAGAGCATCCCGTGGAACTGGAGCGGATTACCCCTC  | 2 485   | Tyr Ile Glu Glu Asp Ser Ser Val Phe Ala Gln Lys His Pro Val Glu Pro Gly Ala Asp Tyr Pro | Frameshift insertion  | Frameshift Mutation | 0,730      |
| TACATCGAGGAGGACTCCTCTGTCTTTGGCC--AGCATCCCGTGGAACTGGAGCGGATTACCCCTC  | 2 407   | Tyr Ile Glu Glu Asp Ser Ser Val Phe Ala Gln His Pro Val Glu Pro Gly Ala Asp Tyr Pro     | Frameshift deletion   | Frameshift Mutation | 0,707      |
| TACATCGAGGAGGACTCCTCTGTCTTTGGCCAGAGCATCCCGTGGAACTGGAGCGGATTACCCCTC  | 1 040   | Tyr Ile Glu Glu Asp Ser Ser Val Phe Ala Gln Ser Ile Pro Trp Asn Leu Glu Arg Ile Thr Thr | Substitution, Pro>Thr | Missense Mutation   | 0,305      |
| TACATCGAGGAGGACTCCTCTGTCTTTGGCCAGAGCATCCCGTGGAACTGGAGCGGATTACCCCTC  | 937     | Tyr Ile Glu Glu Asp Ser Ser Val Phe Ala Gln Ser Ile Gln Trp Asn Leu Glu Arg Ile Thr Pro | Substitution, Pro>Gln | Missense Mutation   | 0,275      |
| TACATCGAGGAGGACTCCTCTGTCTTTGGCCAGAGCATCCCGTGGAACTGGAGCGGATTACCCCTC  | 873     | Tyr Ile Glu Glu Asp Ser Ser Val Phe Ala Gln Ser Ile Pro Trp Asn Leu Glu Arg Ile Thr His | Substitution, Pro>His | Missense Mutation   | 0,256      |
| TACATCGAGGAGGACTCCTCTGTCTTTGGCCAGATGCATCCCGTGGAACTGGAGCGGATTACCCCTC | 852     | Tyr Ile Glu Glu Asp Ser Ser Val Phe Ala Gln Met His Pro Val Glu Pro Gly Ala Asp Tyr Pro | Frameshift insertion  | Frameshift Mutation | 0,250      |
| TACATCGAGGAGGACTCCTCTGTCTTTGGCCAGAGCATCCCGTGGAACTGGAGCGGATTACCCCTC  | 816     | Tyr Ile Glu Glu Asp Ser Ser Val Phe Ala Lys Ser Ile Pro Trp Asn Leu Glu Arg Ile Thr Pro | Substitution, Gln>Lys | Missense Mutation   | 0,240      |

Cas9-gMH (#5\_hPCSK9)

| Alleles                                                             | #Reads  | Protein Sequence                                                                        | Type                  | Outcome             | Percentage |
|---------------------------------------------------------------------|---------|-----------------------------------------------------------------------------------------|-----------------------|---------------------|------------|
| TACATCGAGGAGGACTCCTCTGTCTTTGCCAGAGCATCCCGTGAACCTGGAGCGGATTACCCCTC   | 227 333 | Tyr Ile Glu Glu Asp Ser Ser Val Phe Ala Gln Ser Ile Pro Trp Asn Leu Glu Arg Ile Thr Pro | Wild type             | Wild type           | 68,548     |
| TACATCGAGGAGGACTCCTCTGTCTTTGCCAG--GCATCCCGTGAACCTGGAGCGGATTACCCCTC  | 22 352  | Tyr Ile Glu Glu Asp Ser Ser Val Phe Ala Gln Ala Ser Arg Gly Thr Trp Ser Gly Leu Pro Leu | Frameshift deletion   | Frameshift Mutation | 6,740      |
| TACATCGAGGAGGACTCCTCTGTCTTTGCCAG--GCATCCCGTGAACCTGGAGCGGATTACCCCTC  | 17 805  | Tyr Ile Glu Glu Asp Ser Ser Val Phe Ala Gln Thr Ser Arg Gly Thr Trp Ser Gly Leu Pro Leu | Frameshift deletion   | Frameshift Mutation | 5,369      |
| TACATCGAGGAGGACTCCTCTGTCTTTGCCAG--AGCATCCCGTGAACCTGGAGCGGATTACCCCTC | 7 095   | Tyr Ile Glu Glu Asp Ser Ser Val Phe Ala Gln His Pro Val Glu Pro Gly Ala Asp Tyr Pro     | Frameshift deletion   | Frameshift Mutation | 2,139      |
| TACATCGAGGAGGACTCCTCTGTCTTTGCCAGAGCATCCCGTGAACCTGGAGCGGATTACCCCTC   | 6796    | Tyr Ile Glu Glu Asp Ser Ser Val Phe Ala Gln Lys His Pro Val Glu Pro Gly Ala Asp Tyr Pro | Frameshift insertion  | Frameshift Mutation | 2,049      |
| TACATCGAGGAGGACTCCTCTGTCTTTGCCAGAGCATCCCGTGAACCTGGAGCGGATTACCCCTC   | 2 100   | Tyr Ile Glu Glu Asp Ser Ser Val Phe Ala Gln Arg His Pro Val Glu Pro Gly Ala Asp Tyr Pro | Frameshift insertion  | Frameshift Mutation | 0,633      |
| TACATCGAGGAGGACTCCTCTGTCTTTGCCAGAGCATCCCGTGAACCTGGAGCGGATTACCCCTC   | 1 775   | Tyr Ile Glu Glu Asp Ser Ser Val Phe Ala Gln Met His Pro Val Glu Pro Gly Ala Asp Tyr Pro | Frameshift insertion  | Frameshift Mutation | 0,535      |
| TACATCGAGGAGGACTCCTCTGTCTTTGCCAGAGCATCCCGTGAACCTGGAGCGGATTACCCCTC   | 923     | Tyr Ile Glu Glu Asp Ser Ser Val His Pro Val Glu Pro Gly Ala Asp Tyr Pro                 | Frameshift deletion   | Frameshift Mutation | 0,278      |
| TACATCGAGGAGGACTCCTCTGTCTTTGCCAG---ATCCCGTGAACCTGGAGCGGATTACCCCTC   | 795     | Tyr Ile Glu Glu Asp Ser Ser Val Phe Ala Gln Ile Pro Trp Asn Leu Glu Arg Ile Thr Pro     | Inframe deletion      | Inframe Mutation    | 0,240      |
| TACATCGAGGAGGACTCCTCTGTCTTTGCCAGAGCATCCCGTGAACCTGGAGCGGATTACCACTC   | 734     | Tyr Ile Glu Glu Asp Ser Ser Val Phe Ala Gln Ser Ile Pro Trp Asn Leu Glu Arg Ile Thr Thr | Substitution, Pro>Thr | Missense Mutation   | 0,221      |

Cas9-gMH (#6\_hPCSK9)

| Alleles                                                             | #Reads  | Protein Sequence                                                                        | Type                  | Outcome             | Percentage |
|---------------------------------------------------------------------|---------|-----------------------------------------------------------------------------------------|-----------------------|---------------------|------------|
| TACATCGAGGAGGACTCCTCTGTCTTTGCCAGAGCATCCCGTGAACCTGGAGCGGATTACCCCTC   | 313 218 | Tyr Ile Glu Glu Asp Ser Ser Val Phe Ala Gln Ser Ile Pro Trp Asn Leu Glu Arg Ile Thr Pro | Wild type             | Wild type           | 80,670     |
| TACATCGAGGAGGACTCCTCTGTCTTTGCCAG--GCATCCCGTGAACCTGGAGCGGATTACCCCTC  | 17 531  | Tyr Ile Glu Glu Asp Ser Ser Val Phe Ala Gln Ala Ser Arg Gly Thr Trp Ser Gly Leu Pro Leu | Frameshift deletion   | Frameshift Mutation | 4,515      |
| TACATCGAGGAGGACTCCTCTGTCTTTGCCAG--GCATCCCGTGAACCTGGAGCGGATTACCCCTC  | 14 899  | Tyr Ile Glu Glu Asp Ser Ser Val Phe Ala Gln Thr Ser Arg Gly Thr Trp Ser Gly Leu Pro Leu | Frameshift deletion   | Frameshift Mutation | 3,837      |
| TACATCGAGGAGGACTCCTCTGTCTTTGCCAGAGCATCCCGTGAACCTGGAGCGGATTACCCCTC   | 5 471   | Tyr Ile Glu Glu Asp Ser Ser Val Phe Ala Gln Lys His Pro Val Glu Pro Gly Ala Asp Tyr Pro | Frameshift insertion  | Frameshift Mutation | 1,409      |
| TACATCGAGGAGGACTCCTCTGTCTTTGCCAG--AGCATCCCGTGAACCTGGAGCGGATTACCCCTC | 2828    | Tyr Ile Glu Glu Asp Ser Ser Val Phe Ala Gln His Pro Val Glu Pro Gly Ala Asp Tyr Pro     | Frameshift deletion   | Frameshift Mutation | 0,728      |
| TACATCGAGGAGGACTCCTCTGTCTTTGCCAGAGCATCCCGTGAACCTGGAGCGGATTACCCCTC   | 1 024   | Tyr Ile Glu Glu Asp Ser Ser Val Phe Ala Gln Arg His Pro Val Glu Pro Gly Ala Asp Tyr Pro | Frameshift insertion  | Frameshift Mutation | 0,264      |
| TACATCGAGGAGGACTCCTCTGTCTTTGCCAGAGCATCCCGTGAACCTGGAGCGGATTACCCCTC   | 906     | Tyr Ile Glu Glu Asp Ser Ser Val Phe Ala Gln Met His Pro Val Glu Pro Gly Ala Asp Tyr Pro | Frameshift insertion  | Frameshift Mutation | 0,233      |
| TACATCGAGGAGGACTCCTCTGTCTTTGCCAGAGCATCCCGTGAACCTGGAGCGGATTACCCCTC   | 780     | Tyr Ile Glu Glu Asp Ser                                                                 | Frameshift deletion   | Frameshift Mutation | 0,201      |
| TACATCGAGGAGGACTCCTCTGTCTTTGCCAGAGCATCCCGTGAACCTGGAGCGGATTACCACTC   | 673     | Tyr Ile Glu Glu Asp Ser Ser Val Phe Ala Gln Ser Ile Pro Trp Asn Leu Glu Arg Ile Thr Thr | Substitution, Pro>Thr | Missense Mutation   | 0,173      |
| -----GCATCCCGTGAACCTGGAGCGGATTACCCCTC                               | 619     | Ala Ser Arg Gly Thr Trp Ser Gly Leu Pro Leu                                             | Frameshift deletion   | Frameshift Mutation | 0,159      |
