# Supplementary material for: In vivo genome and base editing of a human PCSK9 knock-in hypercholesterolemic mouse model
Source: PubMed Central journal article supplement (PMC6334452; doi:10.1186/s12915-018-0624-2), 2019-01-15
Supplement: 12915_2018_624_MOESM13_ESM.pdf [file 12915_2018_624_MOESM13_ESM.pdf]

## Additional file 13: Table S7

### List of primers used in this study.

| ID               | Sequence                    | Gene         | Species | Application        |
|------------------|-----------------------------|--------------|---------|--------------------|
| Neo probe Forw   | AAGTATCCATCATGGCTGATG       | Neo cassette |         | ES clone screening |
| Neo probe Rev    | TCGTCAAGAAGGCGATAGAAG       |              |         | ES clone screening |
| P1               | CCAGGTCTGGAATGCAAAGT        | hPCSK9       | Human   | Mouse genotyping   |
| P2               | TTTTGATAAGGCTGCAGAAGGAGC    | R26          | Mouse   | Mouse genotyping   |
| P3               | GTGTTCGTGCAAGTTGAGTCCATC    |              | Mouse   | Mouse genotyping   |
| mPcsk9-Cel-1Forw | GACTTTGTGAAGGCTGGGGA        | Pcsk9        | Mouse   | Surveyor           |
| mPcsk9-Cel-1Rev  | TGCATGGAGCAATGCAGAGA        |              | Mouse   | Surveyor           |
| hPcsk9-Cel-1Forw | ACTCAGGCTCCTAGTCTGTCC       | PCSK9        | Human   | Surveyor           |
| hPcsk9-Cel-1Rev  | CAGATGGGGTCTTACCGGG         |              | Human   | Surveyor           |
| mPcsk9Forw       | CCATGGCCAGCACTGGTATC        | Pcsk9        | Mouse   | Sanger Sequencing  |
| mPcsk9Rev        | GGGATGAAGCCAACACGGAT        |              | Mouse   | Sanger Sequencing  |
| hPCSK9Forw       | GCCTGAGCTTCACTCCATGT        | PCSK9        | Human   | Sanger Sequencing  |
| hPCSK9Rev        | GGCCCTAGGTAGATCACCA         |              | Human   | Sanger Sequencing  |
| mON-Forw         | CATGGCTGTCTGTTCTGTA         | Pcsk9        | Mouse   | Deep sequencing    |
| mON-Rev          | AGG TCA GTG CAG ACT CTG GAG |              | Mouse   | Deep sequencing    |
| hON-Forw         | ATGTGGGGACAGTTTTGATC        | PCSK9        | Human   | Deep sequencing    |
| hON-Rev          | TGGTATTCATCCGCCCGTA         |              | Human   | Deep sequencing    |
| OT1-Forw         | GGTTTCCAGGAGCTGAGGACA       | OT1          | Mouse   | Deep sequencing    |
| OT1-Rev          | CCCCCTCAGAGCAGTTTTAGTT      |              | Mouse   | Deep sequencing    |
| OT6-Forw         | GGCGCTACTCATCACTGCCTGT      | OT6          | Mouse   | Deep sequencing    |
| OT6-Rev          | CAGTTTCTGGAGGTGCCACA        |              | Mouse   | Deep sequencing    |
| OT8-Forw         | TGTGCAGTAAAGAACAACCTTTGAGG  | OT8          | Mouse   | Deep sequencing    |
| OT8-Rev          | ACTTCTGCCAGAGGCACC          |              | Mouse   | Deep sequencing    |
| OT0-Forw         | GGCCTCATGACTTGGGCATCACT     | OT10         | Mouse   | Deep sequencing    |
| OT10-Rev         | AGCTCCTGGTGAAGTAGCCTCCA     |              | Mouse   | Deep sequencing    |
| OT14-Forw        | CCCCGATCTCACTGACCCCTA       | OT14         | Mouse   | Deep sequencing    |
| OT14-Rev         | ACACCTTCGTTGGCCACCTCAG      |              | Mouse   | Deep sequencing    |
| OT16-Forw        | TCTCTGACCTCTGATGGCTCAAGT    | OT16         | Mouse   | Deep sequencing    |
| OT16-Rev         | GCCTGCAGAGCACATCAGGGAT      |              | Mouse   | Deep sequencing    |
| OT17-Forw        | ACACACCACAATGTCTCATTCCAGGA  | OT17         | Mouse   | Deep sequencing    |
| OT17-Rev         | AGGCCATTTGTACCAGCTAGATACT   |              | Mouse   | Deep sequencing    |
| OT24-Forw        | GACCACAGTGCTCACATCCTCCT     | OT24         | Mouse   | Deep sequencing    |
| OT24-Rev         | TGTTTCTCTACCGGAGCTGGC       |              | Mouse   | Deep sequencing    |
| OT29-Forw        | ATTTTGGGACAGGGTTTCTCGCCT    | OT29         | Mouse   | Deep sequencing    |
| OT29-Rev         | GGTAAGGTGAAGTCAGAGGACACA    |              | Mouse   | Deep sequencing    |
| OT34-Forw        | GGGGGAGACAGACCAGGCATAC      | OT34         | Mouse   | Deep sequencing    |
| OT34-Rev         | ACACACCACTCCTCCCCCTAGG      |              | Mouse   | Deep sequencing    |
| OT36-Forw        | GGCTCTTGGGTCCCTTGCAAG       | OT36         | Mouse   | Deep sequencing    |
| OT36-Rev         | TCGTGAGTGGAGGGATCCTGCT      |              | Mouse   | Deep sequencing    |
| OT45-Forw        | AGTACTAGCTGGTCCCCGGTGG      | OT45         | Mouse   | Deep sequencing    |
| OT45-Rev         | GGAGCTTGAGTAGAGGAAAGGC      |              | Mouse   | Deep sequencing    |
| OT58-Forw        | TCCGTGTTGAGCTGTTTGTGA       | OT58         | Mouse   | Deep sequencing    |

|                  |                              |      |       |                    |
|------------------|------------------------------|------|-------|--------------------|
| OT58-Rev         | ACCCCCGTTCAAACCTCCAGTATGC    |      | Mouse | Deep sequencing    |
| OT68-Forw        | TGACACCCACAGCTCAGTTGCT       | OT68 | Mouse | Deep sequencing    |
| OT68-Rev         | TTGCGTTGATGTGTGTGCGTTT       |      | Mouse | Deep sequencing    |
| OT70-Forw        | CCTGCAGGCCAGGCTGC            | OT70 | Mouse | Deep sequencing    |
| OT70-Rev         | TCCGCCCGGTACCGTGA            |      | Mouse | Deep sequencing    |
| OT71-Forw        | ATCATTGGGACCTGCTCTGGGC       | OT71 | Mouse | Deep sequencing    |
| OT71-Rev         | CCCACCCTGACACGAGGACATG       |      | Mouse | Deep sequencing    |
| OT73-Forw        | AGGGCAGAGGGAAAGCACTGTG       | OT73 | Mouse | Deep sequencing    |
| OT73-Rev         | GGTTGTGTGCTCCCTTCTGCT        |      | Mouse | Deep sequencing    |
| OT74-Forw        | CGAGTTCTAGGACAGCCAGGGC       | OT74 | Mouse | Deep sequencing    |
| OT74-Rev         | AGACATCTCAGGAGCTCCCCAG       |      | Mouse | Deep sequencing    |
| OT75-Forw        | TTCTGGGCTCATGGTTCCGGGG       | OT75 | Mouse | Deep sequencing    |
| OT75-Rev         | AGGTCGATTTGTGAAGCCTGGGT      |      | Mouse | Deep sequencing    |
| OT77-Forw        | GGCTCACAAACCATCTGAAACCCC     | OT77 | Mouse | Deep sequencing    |
| OT77-Rev         | CATATCCCCATAATTTCTGTGCCTTTTC |      | Mouse | Deep sequencing    |
| OT78-Forw        | CAGCCAGCACTGTAGACTGAACA      | OT78 | Mouse | Deep sequencing    |
| OT78-Rev         | GGCTGATCTACCCCAATGCCA        |      | Mouse | Deep sequencing    |
| OT79-Forw        | TGTTTGGGAGGAAGGGAGGCATA      | OT79 | Mouse | Deep sequencing    |
| OT79-Rev         | GGCGGGTAGGTGGGATCCTAGG       |      | Mouse | Deep sequencing    |
| OT80-Forw        | TCTGGCTCTGGAGTCTGTCTACA      | OT80 | Mouse | Deep sequencing    |
| OT80-Rev         | ATCTGGAATTTGGAGGATGGGAC      |      | Mouse | Deep sequencing    |
| OT81-Forw        | GGGCTTGGTCACCCCTTTCTC        | OT81 | Mouse | Deep sequencing    |
| OT81-Rev         | TGGACTCTGCCAGATAGAT          |      | Mouse | Deep sequencing    |
| Trans-Forw-mouse | GACTTTGTGAAGGCTGGGA          |      | Mouse | PCR/Translocations |
| Trans-Rev-human  | CATTCTCGAAGTCGGTGACCA        |      | Human | PCR/Translocations |
